# Supplementary material for: Reducing tillage does not affect the long-term profitability of organic or conventional field crop systems
Source: Frontiers journal article supplement (doi:10.3389/fsufs.2022.1004256), 2023-01-10
Supplement: Table_1.XLSX [file Table_1.XLSX]

## Sheet: Sheet1
Year	2008	2009	2010	2011	2012	2013	2016	2017	2018	2019	2020
Labor, $/hr a	11	11	11	11.6	11.7	12.25	13	13	14	14.25	14.75
Fertilizers a
Nitrogen, lb	0.46	0.68	0.33	0.51	0.63	0.58	0.4	0.31	0.3	0.38	0.34
Phosphorus, lb	0.5	0.72	0.38	0.47	0.64	0.48	0.45	0.34	0.39	0.42	0.34
Potash, lb	0.27	0.9	0.43	0.59	0.55	0.5	0.35	0.25	0.27	0.31	0.31
Composted Manure, ton b	9.27	9.15	-	9.67	-	10.21	-	-	10.82	10.93	-
T. ostriniae, $/release c	-	-	-	-	14.4	-	-	-	-	-	-
Seed Costs
Conventional
Maize, 1000 seeds a	2.1	3.13	3.44	3.25	3.4	3.65	3.7	3.43	3.26	3.2	3.22
Soybeans, 140k seeds a	31	45	50	45	58	50	53.6	52.7	52	50.8	47.4
Wheat, bu d	13	15.1	16	15.4	17	18.19	21.54	15.98	20.07	18.5	17.72
Rye, bu e	6.5	7.55	8	7.7	8.5	9.095	10.77	7.99	10.035	9.25	8.86
Vetch, lb f	1.6	1.68	1.86	1.62	1.54	1.648	2.1625	2.28	1.9325	1.524	1.712
Organic
Maize, 1000 seeds g	1.68	2.504	2.752	2.6	2.72	2.92	2.96	2.744	2.608	2.56	2.576
Soybeans, 140k seeds g	24.8	36	40	36	46.4	40	42.88	42.16	41.6	40.64	37.92
Wheat, bu h	15.6	18.12	19.2	18.48	20.4	21.828	25.848	19.176	24.084	22.2	21.264
Oats, bu i	7.8	9.06	9.6	9.24	10.2	10.914	12.924	9.588	12.042	11.1	10.632
Barley, bu h	15.6	18.12	19.2	18.48	20.4	21.828	25.848	19.176	24.084	22.2	21.264
Rye, bu j	7.8	9.06	9.6	9.24	10.2	10.914	12.924	9.588	12.042	11.1	10.632
Vetch, lb k	-	2.016	2.232	1.944	1.848	1.9776	2.595	2.736	2.319	1.8288	2.0544
Clover, lb l	3.36	3.528	3.906	3.402	3.234	3.4608	4.54125	4.788	4.05825	3.2004	3.5952
Alfalfa, lb i	4.8	5.04	5.58	4.86	4.62	4.944	6.4875	6.84	5.7975	4.572	5.136
Orchardgrass, lb i	3.3	4.496	3.6	2.52	2.22	2.376	3.284	4.288	4.864	3.792	4.008
a ECCPI; b Rodale compost production, ECCPI; c IPM Labs / Gagnon et. al. 2016; d ECCPI Oats × 2; e Oats; f ECCPI Alfalfa × 0.40; g ECCPI × 0.80; h ORG Oats × 2; i ECCPI × 1.20; j ORG Oats; k ORG Alfalfa × 0.40; l ORG Alfalfa × 0.70. ECCPI = Estimated Costs of Crop Production in Iowa
