# Supplementary material for: Reducing tillage does not affect the long-term profitability of organic or conventional field crop systems
Source: Frontiers journal article supplement (doi:10.3389/fsufs.2022.1004256), 2023-01-10
Supplement: Table_2.XLSX [file Table_2.XLSX]

## Sheet: Sheet1
Year	2008	2009	2010	2011	2012	2013	2016	2017	2018	2019	2020
Conventional
Maize, bu	4.16	3.84	6.12	7.05	7.21	4.47	4.04	3.87	4.22	4.13	5.05
Soybeans, bu	10.2	9.4	12.1	12.5	14.2	13	9.54	9.34	8.42	8.5	10
Wheat, bu	5.42	4.1	5	6.53	7.97	6.83	4.64	5.21	5.3	5.6	5.55
Oats, bu	3.23	2.74	3.14	4.3	4.2	3.91	2.76	3.57	4.02	4.18	3.95
Barley, bu	-	-	3.46	4.79	4.28	3.89	-	-	-	-	-
Rye, bu	-	-	-	-	-	-	3.8512	-	-	-	-
Straw, ton a	129.75	98.25	90	108	123	138	133.5	123	136.5	138	138.75
Hay, ton	173	131	120	144	164	184	178	164	182	184	185
Silage Corn, ton b	57.09	43.23	39.6	47.52	54.12	60.72	58.74	54.12	60.06	60.72	61.05
Organic
Maize, bu c	0	0	0	0	0	0	0	0	0	0	0
Soybeans, bu c	0	0	0	0	0	0	0	0	0	0	0
Wheat, bu c	0	0	0	0	0	0	0	0	0	0	0
Oats, bu d	0	0	0	0	0	0	0	0	0	0	0
Barley, bu d	-	-	0	0	0	0	-	-	-	-	-
Rye, bu	-	-	-	-	-	-	12.1124	-	-	-	-
Straw, ton a	129.75	98.25	90	108	123	138	133.5	123	136.5	138	138.75
Hay, ton d	0	0	0	0	0	0	0	0	0	0	0
Silage Corn, ton e	0	0	0	0	0	0	0	0	0	0	0
a 0.75 × hay (all) USDA NASS – PA; b 0.33x hay (all) USDA NASS – PA; c Organic price premium for italicized values based on organic premium from Iowa (Iowa values from USDA NASS and AMS); d Organic price premium for italicized values interpolated based on the price premium in adjacent years; e Italicized values = 0.33x organic hay
