# Supplementary material for: Reducing tillage does not affect the long-term profitability of organic or conventional field crop systems
Source: Frontiers journal article supplement (doi:10.3389/fsufs.2022.1004256), 2023-01-10
Supplement: Table_3.XLSX [file Table_3.XLSX]

## Sheet: Sheet1
System	Tillage	All Crops			Maize			Soybeans			Oats			Wheat			Barley			Corn Silage			Hay
		t	(df)	P	t	(df)	P	t	(df)	P	t	(df)	P	t	(df)	P	t	(df)	P	t	(df)	P	t	(df)	P
CNV	FT	1.9	11	0.09	1.6	10	0.13	3.3	9	0.009	-			NA			-			-			-
	RT	0.03	11	0.98	-0.6	10	0.56	1.7	9	0.11	-			-3.1	5	0.03	-			-			-
LEG	FT	-3.6	10	0.005	-1.7	8	0.12	-4.1	4	0.02	0.5	7	0.6	-4.6	5	0.006	-2.1	3	0.16	-			-
	FT-dc	-			-			-4.9	2	0.04	-			-			-			-			-
	RT	-3.5	10	0.006	-3.1	8	0.01	-12.2	7	< 0.0001	1.3	7	0.24	-3.8	5	0.01	-			-			-
MNR	FT	2	11	0.07	0.6	4	0.6	-1.2	3	0.32	9.1	3	0.003	-2.1	5	0.09	-			-2.6	3	0.08	5	7	0.002
	RT	1.4	11	0.19	0.2	4	0.88	-1.1	3	0.36	5.9	3	0.01	-3.3	4	0.03	-			-2.9	3	0.06	4.5	7	0.003
